# Supplementary material
Source: Elsevier journal article supplement (https://natap.org/2024/HCV/mmc12.pdf)
Supplement: mmc12 [file mmc12.pdf]

# THE LANCET HIV

## Supplementary appendix

This appendix formed part of the original submission and has been peer reviewed. We post it as supplied by the authors.

Supplement to: Sacks-Davis R, van Santen DK, Boyd A, et al. Changes in incidence of hepatitis C virus reinfection and access to direct-acting antiviral therapies in people with HIV from six countries, 2010–19: an analysis of data from a consortium of prospective cohort studies. *Lancet HIV* 2024; published online Jan 12. [https://doi.org/10.1016/S2352-3018\(23\)00267-9](https://doi.org/10.1016/S2352-3018(23)00267-9).

# InCHEHC HCV reinfection supplementary material

---

## Contents

|                                                                                                                                                                                                                                                                                        |    |
|----------------------------------------------------------------------------------------------------------------------------------------------------------------------------------------------------------------------------------------------------------------------------------------|----|
| 1. Detailed methods .....                                                                                                                                                                                                                                                              | 2  |
| 2. Supplementary Tables and Figures .....                                                                                                                                                                                                                                              | 11 |
| <b>Table S1:</b> Study design and characteristics of countries and cohort studies included in this analysis .....                                                                                                                                                                      | 11 |
| <b>Table S2:</b> Baseline characteristics of 6144 participants at risk of reinfection by country .....                                                                                                                                                                                 | 12 |
| <b>Table S3:</b> Follow up, reinfection events, and HCV RNA testing among 6144 participants at risk of reinfection, by country.....                                                                                                                                                    | 13 |
| <b>Figure S1:</b> Per-month probability of RNA testing among those at risk of reinfection per country over time .....                                                                                                                                                                  | 14 |
| <b>Figure S2:</b> Proportion and number of events due to reinfection, including multiple reinfections, in five countries with primary and reinfection data available.....                                                                                                              | 15 |
| <b>Table S4:</b> List of sensitivity analyses and differences relative to the primary analysis.....                                                                                                                                                                                    | 16 |
| <b>Table S5:</b> Sensitivity analysis: Piecewise Exponential Model .....                                                                                                                                                                                                               | 17 |
| <b>Table S6:</b> Sensitivity analysis: association between DAA change points and change in rate of change of HCV incidence .....                                                                                                                                                       | 18 |
| <b>Figure S3:</b> Predicted incidence of first HCV reinfection in 6144 participants of InCHEHC cohorts prior to and during limited and broad DAA access: Changes in the rate of change by country, sensitivity analysis where Australia was assumed to have a limited access period .. | 19 |
| <b>Figure S4:</b> Sensitivity analysis 7 showing robust sandwich estimator (GEE) vs standard Poisson confidence intervals for the calculation of combined HCV incidence (primary and reinfection incidence).....                                                                       | 20 |
| 3. on behalf of the InCHEHC Collaboration:.....                                                                                                                                                                                                                                        | 21 |
| 4. Participating cohort ethics and funding .....                                                                                                                                                                                                                                       | 22 |
| Ethics committees .....                                                                                                                                                                                                                                                                | 22 |
| Funding.....                                                                                                                                                                                                                                                                           | 22 |
| 5. Additional acknowledgements.....                                                                                                                                                                                                                                                    | 23 |

# **1. Detailed methods**

## **Primary HCV infection eligibility, case definition and follow-up**

Primary HCV infection was measured for the purpose of calculating combined HCV incidence (defined as primary and reinfection incidence, including first and subsequent reinfections). Individuals with at least one HCV antibody negative test and a subsequent HCV test were included in the analysis of primary HCV infection. Primary HCV infection was defined as a positive antibody or RNA test result after the inclusion date. Estimated HCV primary infection date was the midpoint date between the last HCV antibody negative test date and the first HCV positive test. Individuals were considered be at risk for HCV infection from their first HCV antibody negative test until estimated infection date or the last HCV antibody negative test date. Follow up began at January 1, 2010, if previously antibody negative, or first negative antibody test after this date. Follow-up ended at the estimated primary HCV infection date or the last HCV antibody negative test during the study period. A subset of six cohorts from five countries were included in this analysis because they had HCV primary infection data (ACCESS, AQUITAINE, ATHENA, CoRIS, SAIDCC and SHCS).<sup>1</sup>

## **Subsequent HCV reinfection eligibility, case definition and follow-up**

Multiple HCV reinfections per person were included in the analysis of combined HCV incidence (primary and reinfection incidence, including first and subsequent reinfections). Individuals who were reinfected once during the observation period were censored at the first reinfection event, but were eligible to re-enter the study if there was evidence of a subsequent treatment or spontaneous clearance event after the first reinfection, with at least one HCV RNA test after clearance enabling measurement of subsequent reinfection. Treatment clearance was sustained virological response (SVR), defined as a negative HCV RNA result at least 12 weeks after DAA or combined DAA and PEG-interferon treatment or 24 weeks after (PEG-) interferon treatment. Spontaneous clearance was defined as two consecutive undetectable HCV RNA tests, at least 28 days apart, following HCV infection in participants without a recorded HCV treatment.

We defined subsequent HCV reinfection as an RNA positive test following spontaneous clearance or SVR after the previous reinfection. We defined HCV RNA status (positive vs negative) based on a qualitative RNA or antigen test, or if there was no qualitative result available, an RNA quantitative test result. Quantitative RNA test results were classified as positive if the result was greater than or equal to the lower limit of detection, or 15 copies/mL if the lower limit of detection was unknown.

The estimated date of reinfection was the midpoint between the first HCV RNA positive test following spontaneous clearance or SVR, indicating reinfection, and the previous HCV RNA negative test.

### **Detailed methods: regression model for the change in slope of HCV reinfection incidence**

We assessed whether the rate of change of HCV reinfection incidence (slope) differed by DAA access period using a Poisson regression model with a random intercept for each country. For this analysis, follow-up time was split at the calendar month level so that each record only spanned one DAA policy period, each of which was assumed to start on the first day of a calendar month. Time in months was included as a continuous variable and modelled as a linear spline with two knots at country-specific DAA access change-points. In this model, incidence was assumed to change by a fixed percentage each year, while allowing the slope to differ during each DAA period. The slope in each DAA period was common across countries but the calendar timing of the DAA periods varied between countries, depending on the country-specific timing of policy changes. Confidence intervals at the 95% level were calculated using an empirical bootstrap with 200 samples.

### **Detailed methods: regression equations for each model:**

#### 1. Average incidence per period model:

A Poisson regression model was used to estimate the average first HCV reinfection incidence in each DAA period for a given country. The model was implemented as a generalized linear model with a Poisson family and a *log* link. In the following regression equation,  $i$  represents a data record for a participant in country,  $j$ . The individual-level data are split by DAA period so that each record represents a period of time that is within a single participant and DAA-period.  $I(\text{Period} = \text{limited DAA access})_{i,j}$  is an indicator variable that specifies whether record  $i$  is in the limited DAA access period in country  $j$ . Similarly,  $I(\text{Period} = \text{broad DAA access})_{i,j}$  is an indicator variable that specifies whether record  $i$  is in the broad DAA access period in country  $j$ . The reference category is the pre-DAA period.  $\text{FollowUp}_{i,j}$  represents the duration of follow-up for that data record and  $\text{Reinfection}_{i,j}$  represents whether a first reinfection was observed in that follow-up period.  $\beta_0$  represents the overall intercept, and  $e^{\beta_0}$  is the average HCV incidence in January 2010.  $\text{Country}_j$  is the country-level random intercept, and  $e^{\beta_0 + \mu_j}$  is the average HCV incidence in January 2010 in country,  $j$ .  $\beta_1$  and  $\beta_2$  are the regression coefficients for the DAA period variables,  $e^{\beta_1}$  is the incidence rate ratio for the limited access period compared to the pre-DAA period, and  $e^{\beta_2}$  is the incidence rate ratio for the broad access period compared to the pre-DAA period. The term

$offset[\log(FollowUp_{i,j})]$  is the offset, which is constrained at 1 and facilitates prediction of incidence using a Poisson regression model.

$$\begin{aligned} & \log(Reinfection_{i,j}) \\ &= \beta_0 + Country_j + \beta_1 \times I(Period = limited\ DAA\ access)_{i,j} \\ &+ \beta_2 \times I(Period = broad\ DAA\ access)_{i,j} + offset[\log(FollowUp_{i,j})] \end{aligned}$$

This model is equivalent to a piecewise exponential survival model, where the time scale is divided into intervals, in this case DAA access periods, and the hazard function is assumed to be constant within each interval. As described by Austin, a piecewise exponential model can be fit using a generalized linear model with a Poisson family and log link using an offset, which has the advantage that a random effect can be used to account for clustering:

*Austin, P.C. (2017). A Tutorial on Multilevel Survival Analysis: Methods, Models and Applications. International Statistical Review. 85 (2): 185-203. doi:10.1111/insr.12214*

## 2. Change in slope model:

A change in slope model was used to estimate the change in slope in first HCV reinfection incidence associated with changes in DAA period. In the following regression equation,  $i$  represents a data record for a participant in country,  $j$ . The data are split by calendar month so that each record represents a period of time that is within a single participant and calendar month. Each calendar month is nested in a single DAA-period by definition because the start of each DAA-period, within a country, was defined as the first day of the calendar month in which they occurred. Time in years was modelled as a linear spline with two knots at country-specific DAA access change-points. This was achieved using three time variables to model the time in each of the three DAA access periods. For records occurring in the pre-DAA period,  $Time1_{i,j}$  was the time in years since January 2010 at the end of follow-up for record  $i$  in country  $j$ . To ensure that the incidence rate at the start of the limited DAA access period was equal to the incidence rate at the end of the pre-DAA access period, for records occurring during limited or broad DAA access,  $Time1_{i,j}$  was the time in years since January 2010 at the start of the limited DAA access period. For records occurring during the limited DAA access period,  $Time2_{i,j}$  was the time in years since the start of the limited access period at the end of follow-up for record  $i$  in country  $j$ . For records occurring in the pre-DAA access period,  $Time2_{i,j}$  was 0. For records occurring in the broad DAA access period,  $Time2_{i,j}$  was the time in

years from the start of the limited DAA access period to the start of the broad DAA access period.  $Time3_{i,j}$  was the time in years since the start of the broad access period at the end of follow-up for record  $i$  in country  $j$ . If the end of follow-up for record  $i$  in country  $j$  is prior to the beginning of broad access in country  $j$ , then  $Time3_{i,j}$  was equal to 0.  $FollowUp_{i,j}$  represents the duration of follow-up for that data record and  $Reinfection_{i,j}$  represents whether a first reinfection was observed in that follow-up period.  $\beta_0$  represents the overall intercept, and  $e^{\beta_0}$  is the overall average HCV incidence in January 2010 across all countries.  $Country_j$  is the country-level random intercept, and  $e^{\beta_0 + Country_j}$  is the average HCV incidence in January 2010 in country,  $j$ .  $\beta_1$  represents the slope in the pre-DAA period,  $\beta_2$  represents the slope in the limited DAA-access period, and  $\beta_3$  represents the slope in the broad DAA -access period. The term  $offset[\log(FollowUp_{i,j})]$  is the offset, which is constrained at 1 and facilitates prediction of incidence using a Poisson regression model.

$$\log(Reinfection_{i,j}) = \beta_0 + Country_j + \beta_1 \times Time1_{i,j} + \beta_2 \times Time2_{i,j} + \beta_3 \times Time3_{i,j} + offset[\log(FollowUp_{i,j})]$$

Effectively, this model is fitting a linear spline for time with knots at the boundaries between DAA periods. The knot placement varies between countries because the timing of changes to DAA access vary between countries. The changes in slope in the limited and broad DAA periods compared to the pre-DAA period were calculated by taking the difference between  $\beta_1$  and  $\beta_2$  and  $\beta_3$ , respectively.

### 3. Interrupted time series model (Sensitivity Analysis 1):

In addition to the two models included in the primary analysis, we also considered an interrupted time series model as a sensitivity analysis. In the following regression equation,  $i$  represents a data record for a participant in country,  $j$ . Similar to the data set up for the change in slope model, the data are split by calendar month so that each record represents a period of time that is within a single participant and calendar month. Each calendar month is nested in a single DAA-period by definition because start of each DAA-periods within a country were defined as the first day of the calendar month in which they occurred. Similar to the average incidence per period model,  $I(Period = limited\ DAA\ access)_{i,j}$  is an indicator variable that specifies whether record  $i$  is in the limited DAA access period in country  $j$  and  $I(Period = broad\ DAA\ access)_{i,j}$  is an indicator variable that specifies whether record  $i$  is in the broad DAA access period in country  $j$ . Similar to the change in slope model,  $Time1_{i,j}$  was the time in years since January 2010 at the end of follow-up for record  $i$  in

country  $j$  for records occurring in the pre-DAA period and the time in years since January 2010 at the start of the limited DAA access period for records occurring during limited or broad DAA access. For records occurring during the limited DAA access period,  $Time2_{i,j}$  was the time in years since the start of the limited access period at the end of follow-up for record  $i$  in country  $j$ . For records occurring in the pre-DAA access period,  $Time2_{i,j}$  was 0. For records occurring in the broad DAA access period,  $Time2_{i,j}$  was the time in years from the start of the limited DAA access period to the start of the broad DAA access period.  $Time3_{i,j}$  was the time in years since the start of the broad access period at the end of follow-up for record  $i$  in country  $j$ . If the end of follow-up for record  $i$  in country  $j$  is prior to the beginning of broad access in country  $j$ , then  $Time3_{i,j}$  was equal to 0.

$FollowUp_{i,j}$  represents the duration of follow-up for that data record and  $Reinfection_{i,j}$  represents whether a first reinfection was observed in that follow-up period.  $\beta_0$  represents the overall intercept, and  $e^{\beta_0}$  is the average HCV incidence in January 2010.  $Country_j$  is the country-level random intercept, and  $e^{\beta_0+Country_j}$  is the average HCV incidence in January 2010 in country,  $j$ .  $\beta_1$  and  $\beta_2$  are the regression coefficients for the DAA period variables,  $e^{\beta_1}$  is the incidence rate ratio for immediate change in incidence at the start of the limited access period compared to the end of the pre-DAA period, and  $e^{\beta_2}$  is the incidence rate ratio for the immediate change in incidence at the start of the broad access period compared to the end of the limited access period.  $\beta_3$  is the slope in the pre-DAA period,  $\beta_4$  is the slope in the limited DAA-access period, and  $\beta_5$  is the slope in the broad DAA-access period. The term  $offset[\log(FollowUp_{i,j})]$  is the offset, which is constrained at 1 and facilitates prediction of incidence using a Poisson regression model.

$$\begin{aligned} & \log(Reinfection_{i,j}) \\ &= \beta_0 + Country_j + \beta_1 \times I(Period = limited\ DAA\ access)_{i,j} \\ &+ \beta_2 \times I(Period = broad\ DAA\ access)_{i,j} + \beta_3 \times Time1_{i,j} + \beta_4 \times Time2_{i,j} + \beta_5 \times Time3_{i,j} \\ &+ offset[\log(FollowUp_{i,j})] \end{aligned}$$

This model differs from the change in slope model in that at each boundary there is a change in both level and slope. Whereas in the change in slope model, the slopes join at the knots; in this model, there can be a step between slopes.

The following figure illustrates the characteristics of the average incidence per period model, the change in slope model and the interrupted time series model side-by-side, in order to clarify how they differ. Plots are on a log scale. Please note that this figure is purely stylistic and does not match the fitted model parameters based on the study data.

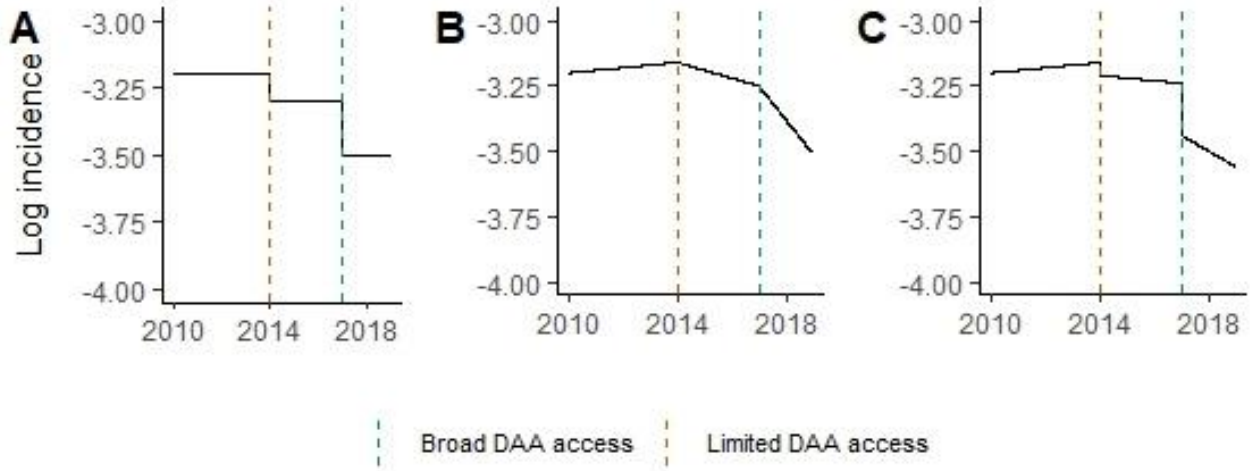

A: Average incidence per period model, B: change in slope model, C: interrupted time series model

#### 4. Change in slope model with random slopes per country for each DAA period

We also attempted to fit a change in slope model with random slopes for each country to estimate the change in slope in first HCV reinfection incidence associated with changes in DAA period, while allowing the slope and change in slope to vary between country in each DAA period. In the following regression equation,  $i$  represents a data record for a participant in country,  $j$ . The data are split by calendar month so that each record represents a period of time that is within a single participant and calendar month. Each calendar month is nested in a single DAA-period by definition because the start of each DAA-period, within a country, was defined as the first day of the calendar month in which they occurred.  $Time1_{i,j}$ ,  $Time2_{i,j}$ ,  $Time3_{i,j}$ ,  $FollowUp_{i,j}$  and  $Reinfection_{i,j}$  were defined in the same way as in the change in slope model described above.  $\beta_0$  represents the overall intercept, and  $e^{\beta_0}$  is the average HCV incidence in January 2010.  $Country_{0j}$  is the country-level random intercept, and  $e^{\beta_0 + Country_{0j}}$  is the average HCV incidence in January 2010 in country,  $j$ .  $\beta_1$  is the average slope in the pre-DAA period across countries,  $Country_{1j}$  is the random component of the slope which allows the pre-DAA slope to differ by country. Similarly,  $\beta_2$  and  $\beta_3$  represent the average slopes in the limited and broad DAA -access periods, respectively.  $Country_{2j}$  and  $Country_{3j}$  represent the



random components of the slopes in the limited and broad DAA access periods, respectively. Similar to the other models, the term  $offset[\log(FollowUp_{i,j})]$  is the offset, which is constrained at 1 and facilitates prediction of incidence using a Poisson regression model.

$$\begin{aligned} & \log(Reinfection_{i,j}) \\ &= \beta_0 + Country_{0j} + (\beta_1 + Country_{1j}) \times Time1_{i,j} + (\beta_2 + Country_{2j}) \times Time2_{i,j} \\ &+ (\beta_3 + Country_{3j}) \times Time3_{i,j} + offset[\log(FollowUp_{i,j})] \end{aligned}$$

Effectively, this model is fitting a separate linear spline for time with knots at the boundaries between DAA periods for each country. The knot placement varies between countries because the timing of changes to DAA access vary between countries. This model differs from the change in slope model described above because it does not assume a common slope between countries in any of the DAA periods. However, when we tried to fit this model, that led to an estimate of zero variance for the random slopes in the pre-DAA and limited DAA access periods (data not shown), indicating no support in the data for this more complex model.

#### 5. Change in slope model with a random slope per country for the broad DAA access period (Sensitivity Analysis 2)

Finally, we fitted a change in slope model with only one random slope in the broad DAA access period. The model was defined similarly to the previous model, but without random slope components for the pre-DAA or limited DAA access periods:

$$\begin{aligned} & \log(Reinfection_{i,j}) \\ &= \beta_0 + Country_{0j} + \beta_1 \times Time1_{i,j} + \beta_2 \times Time2_{i,j} + (\beta_3 + Country_{3j}) \times Time3_{i,j} \\ &+ offset[\log(FollowUp_{i,j})] \end{aligned}$$

Effectively, this model is fitting a linear spline for time with knots at the boundaries between DAA periods for each country. The knot placement varies between countries because the timing of changes to DAA access vary between countries. This model differs from the random slope model described above because it assumes a common slope between countries in the first two periods (pre-DAA and limited DAA access) and only allows the slope to vary between countries in the broad DAA access period.

## References

1. van Santen DK, Sacks-Davis R, van der Valk M, et al. Effect of direct acting antivirals on HCV incidence among people living with HIV. CROI. Boston; 2021.
2. Braun DL, Hampel B, Ledergerber B, et al. A treatment as prevention trial to eliminate hepatitis C among men who have sex with men living with HIV in the Swiss HIV Cohort Study. *Clin Infect Dis* 2020.



## 2. Supplementary Tables and Figures

**Table S1: Study design and characteristics of countries and cohort studies included in this analysis**

| Country                | Limited DAA availability | Limited DAA availability definition                                                              | Broad DAA availability | Cohort                        | Study design and coverage of PHIV in care in the respective country                                                                                                                     | Start cohort | Primary HCV incidence data available |
|------------------------|--------------------------|--------------------------------------------------------------------------------------------------|------------------------|-------------------------------|-----------------------------------------------------------------------------------------------------------------------------------------------------------------------------------------|--------------|--------------------------------------|
| <b>Australia</b>       | NA                       | NA                                                                                               | March 2016             | ACCESS                        | Nationwide linked database from primary care, community clinics, hospitals, and pathology laboratories covers 59% PHIV in care in Australia                                             | 2009         | ✓                                    |
| <b>Canada</b>          | June 2014                | Moderate to severe fibrosis (varied by Province)                                                 | March 2017             | Canadian coinfection cohort   | Multi-site prospective observational (18 clinical/community-based sites). Covers 15% of PHIV with HCV antibodies in Canada.                                                             | 2003         |                                      |
| <b>France</b>          | January 2014             | Severe fibrosis, and patients with comorbidities, including HIV coinfection                      | August 2017            | AQUITAINE                     | Multi-site prospective hospital-based cohort (13 sites through South-Western France). Covers 85% of PLHIV living in Nouvelle Aquitaine.                                                 | 1987         | ✓                                    |
|                        |                          |                                                                                                  |                        | SAIDCC                        | Single-site (Paris) hospital and clinic-recruited prospective cohort. Includes 35% in COREVIH Ile de France Centre.                                                                     | 1992         | ✓                                    |
|                        |                          |                                                                                                  |                        | HEPAVIH                       | Nationwide multi-site prospective study of people with HIV and HCV antibodies. Participants recruited from hospitals and HIV cohorts (29 sites). Coverage of PHIV in France is unknown. | 2005         |                                      |
| <b>The Netherlands</b> | November 2014            | Moderate to severe fibrosis                                                                      | November 2015          | ATHENA                        | Nationwide prospective cohort includes 98% PHIV in care in the Netherlands                                                                                                              | 1998         | ✓                                    |
| <b>Spain</b>           | January 2015             | Severe fibrosis and those with high risk of transmission such as MSM with ongoing risk behaviour | June 2017              | CORIS                         | Multi-centre prospective cohort study of people diagnosed with HIV after 2004 in 28 hospital-based sites. Coverage of PHIV in care in Spain: 12% (~15,000 of ~130,00 in care)           | 2004         | ✓                                    |
| <b>Switzerland</b>     | April 2014               | Severe fibrosis or defined extrahepatic manifestation                                            | November 2017          | Swiss HIV cohort study (SHCS) | Nationwide prospective cohort involving 71% PHIV on ART in Switzerland (59% of estimated total population of people living with HIV)                                                    | 1988         | ✓                                    |

Abbreviations: NA: not applicable, PHIV: people with HIV, ACCESS: Australian Collaboration for Coordinated Enhanced Sentinel Surveillance; co-EC: Eliminating hepatitis C transmission by enhancing care and treatment among HIV co-infected individuals; ATHENA: AIDS Therapy Evaluation in the Netherlands; SAIDCC: Saint-Antoine Infectious Disease Clinical Cohort; CoRIS: The cohort of Spanish HIV research network; AQUITAINE: ANRS CO3 AQUITAINE / AquiviH-NA; HEPAVIH: Clinical Centres Collaborations of Subjects Co-infected with HIV and HCV.

**Table S2: Baseline characteristics of 6144 participants at risk of reinfection by country**

| Characteristic                                   | Total (N=6144)    | Australia (N=878)      | Canada (N=743)    | France (N=1583)   | Spain (N=454)     | Switzerland (N=1171) | the Netherlands (N=1315) |
|--------------------------------------------------|-------------------|------------------------|-------------------|-------------------|-------------------|----------------------|--------------------------|
| <b>Time period first at risk of reinfection</b>  |                   |                        |                   |                   |                   |                      |                          |
| Pre DAA access                                   | 2560 (42%)        | 379 (43%)              | 234 (31%)         | 617 (39%)         | 160 (35%)         | 496 (42%)            | 674 (51%)                |
| Limited DAA access                               | 1897 (31%)        | 0 (0%)                 | 288 (39%)         | 864 (55%)         | 178 (39%)         | 463 (40%)            | 104 (8%)                 |
| Broad DAA access                                 | 1687 (27%)        | 499 (57%)              | 221 (30%)         | 102 (6%)          | 116 (26%)         | 212 (18%)            | 537 (41%)                |
| <b>Sex at birth<sup>a</sup></b>                  |                   |                        |                   |                   |                   |                      |                          |
| Male                                             | 4989 (81%)        | 846 (97%)              | 537 (73%)         | 1184 (75%)        | 374 (82%)         | 841 (72%)            | 1207 (92%)               |
| Female                                           | 1137 (19%)        | 28 (3%)                | 194 (27%)         | 397 (25%)         | 80 (18%)          | 330 (28%)            | 108 (8%)                 |
| <b>Age, yrs</b>                                  |                   |                        |                   |                   |                   |                      |                          |
| Median (IQR)                                     | 48.6 (42.2, 54.0) | 47.1 (40.2, 53.8)      | 50.3 (43.6, 55.6) | 51.0 (45.8, 54.9) | 46.0 (39.4, 51.4) | 48.3 (42.3, 53.7)    | 45.9 (38.9, 52.1)        |
| <b>Risk group</b>                                |                   |                        |                   |                   |                   |                      |                          |
| MSM+PWID                                         | 277 (5%)          | 0 (0%) <sup>b</sup>    | 92 (12%)          | 49 (3%)           | 0 (0%)            | 136 (12%)            | 0 (0%)                   |
| PWID                                             | 2083 (34%)        | 0 (0%) <sup>b</sup>    | 391 (53%)         | 856 (54%)         | 187 (41%)         | 499 (43%)            | 150 (11%)                |
| MSM                                              | 2559 (42%)        | 682 (78%)              | 115 (15%)         | 315 (20%)         | 165 (36%)         | 308 (26%)            | 974 (74%)                |
| Other/Unknown                                    | 1225 (20%)        | 196 (22%)              | 145 (20%)         | 363 (23%)         | 102 (22%)         | 228 (19%)            | 191 (15%)                |
| <b>Clearance type (previous infection)</b>       |                   |                        |                   |                   |                   |                      |                          |
| Spontaneous clearance                            | 1883 (31%)        | 599 (68%) <sup>c</sup> | 167 (22%)         | 269 (17%)         | 155 (34%)         | 402 (34%)            | 291 (22%)                |
| Treatment clearance                              | 4261 (69%)        | 279 (32%)              | 576 (78%)         | 1314 (83%)        | 299 (66%)         | 769 (66%)            | 1024 (78%)               |
| <b>Time since HIV diagnosis, yrs<sup>d</sup></b> |                   |                        |                   |                   |                   |                      |                          |
| Median (IQR)                                     | 12.5 (5.8, 21.9)  | 5.2 (2.2, 7.6)         | 14.4 (8.3, 19.8)  | 22.0 (14.6, 26.7) | 6.5 (2.6, 11.2)   | 18.0 (9.9, 24.5)     | 8.9 (4.6, 15.7)          |
| <b>Time since first HCV diagnosis, yrs</b>       |                   |                        |                   |                   |                   |                      |                          |
| Median (IQR)                                     | 6.7 (1.8, 14.5)   | 2.0 (0.7, 5.0)         | 12.4 (6.7, 17.8)  | 13.4 (6.2, 19.7)  | 2.9 (1.2, 6.9)    | 10.2 (3.8, 16.7)     | 2.3 (1.1, 7.7)           |
| <b>CD4 cell count<sup>ef</sup></b>               |                   |                        |                   |                   |                   |                      |                          |
| Median (IQR)                                     | 580 (410, 795)    | 605 (442, 826)         | 511 (340, 736)    | 586 (409, 806)    | 542 (369, 803)    | 585 (425, 809)       | 580 (430, 780)           |
| <b>HIV viral load suppressed<sup>fg</sup></b>    |                   |                        |                   |                   |                   |                      |                          |
| Yes                                              | 4997 (81%)        | 228 (26%)              | 668 (90%)         | 1474 (93%)        | 376 (83%)         | 1091 (93%)           | 1160 (88%)               |
| No                                               | 483 (8%)          | 44 (5%)                | 65 (9%)           | 87 (5%)           | 74 (16%)          | 72 (6%)              | 141 (11%)                |
| Unknown                                          | 664 (11%)         | 606 (69%)              | 10 (1%)           | 22 (1%)           | 4 (1%)            | 8 (1%)               | 14 (1%)                  |
| <b>Fibrosis-4<sup>f</sup></b>                    |                   |                        |                   |                   |                   |                      |                          |
| <1.45                                            | 2210 (36%)        | 19 (2%)                | 373 (50%)         | 220 (14%)         | 251 (55%)         | 658 (56%)            | 689 (52%)                |
| >1.45                                            | 1735 (28%)        | 15 (2%)                | 353 (48%)         | 380 (24%)         | 147 (32%)         | 483 (41%)            | 357 (27%)                |
| Unknown                                          | 2199 (36%)        | 844 (96%)              | 17 (2%)           | 983 (62%)         | 56 (12%)          | 30 (3%)              | 269 (20%)                |

Abbreviations: HCV: Hepatitis C virus; IQR: interquartile range; PWID: people who inject drugs; MSM: men who have sex with men. <sup>a</sup>Data on sex at birth were missing for 18 participants. <sup>b</sup>HIV transmission in Australia uncommon in PWID and PWID status not collected in the ACCESS surveillance system. <sup>c</sup>Spontaneous clearance is defined as two HCV RNA negative tests at least 28 days apart where there is no evidence of treatment. Missing treatment data may lead to misclassification of treatment clearance as spontaneous clearance. In Australia, due to health system differences, participants are more likely to access HIV care at a different practice to where they access HCV treatment, which may result in additional missing treatment data if the HCV-treating practice is not part of the ACCESS network. <sup>d</sup>Data on date of HIV diagnosis were missing for 32 participants. <sup>e</sup>Data on CD4 were missing for 127 participants. <sup>f</sup>Measurement within one year of first at risk of reinfection. Where multiple measurements were available per person, the closest to the date at risk of reinfection was used. <sup>g</sup><200 copies/mL.

**Table S3: Follow up, reinfection events, and HCV RNA testing among 6144 participants at risk of reinfection, by country**

| Characteristic                                     | Total (N=6144) | Australia (N=878) | Canada (N=743) | France (N=1583) | Spain (N=454)  | Switzerland (N=1171) | the Netherlands (N=1315) |
|----------------------------------------------------|----------------|-------------------|----------------|-----------------|----------------|----------------------|--------------------------|
| <b>Time at risk (years)<sup>a</sup></b>            |                |                   |                |                 |                |                      |                          |
| Median (IQR)                                       | 2.1 (0.9, 3.9) | 2.0 (1.1, 3.2)    | 2.3 (1.0, 4.1) | 2.1 (1.0, 3.9)  | 1.2 (0.5, 2.5) | 2.3 (1.0, 5.0)       | 2.0 (0.8, 4.0)           |
| <b>Number of reinfection events</b>                |                |                   |                |                 |                |                      |                          |
| Events                                             | 643            | 94                | 67             | 88              | 47             | 97                   | 250                      |
| <b>Number of tests per person during follow-up</b> |                |                   |                |                 |                |                      |                          |
| Median (IQR)                                       | 3.0 (2.0, 4.0) | 3.0 (2.0, 5.0)    | 4.0 (2.0, 6.0) | 3.0 (2.0, 4.0)  | 3.0 (2.0, 3.0) | 3.0 (2.0, 4.0)       | 3.0 (2.0, 4.0)           |
| <b>Test interval (years)</b>                       |                |                   |                |                 |                |                      |                          |
| Median (IQR) <sup>b</sup>                          | 0.9 (0.5, 1.5) | 0.8 (0.5, 1.3)    | 0.7 (0.5, 1.0) | 1.0 (0.6, 1.5)  | 0.7 (0.4, 1.4) | 1.0 (0.5, 2.2)       | 0.8 (0.5, 1.6)           |

Abbreviations: HCV: Hepatitis C virus; IQR: interquartile range

<sup>a</sup>Time between HCV clearance and last HCV RNA negative test or estimated reinfection date.

<sup>b</sup>Median of the mean number of years between tests per person

**Figure S1:** Per-month probability of RNA testing among those at risk of reinfection per country over time

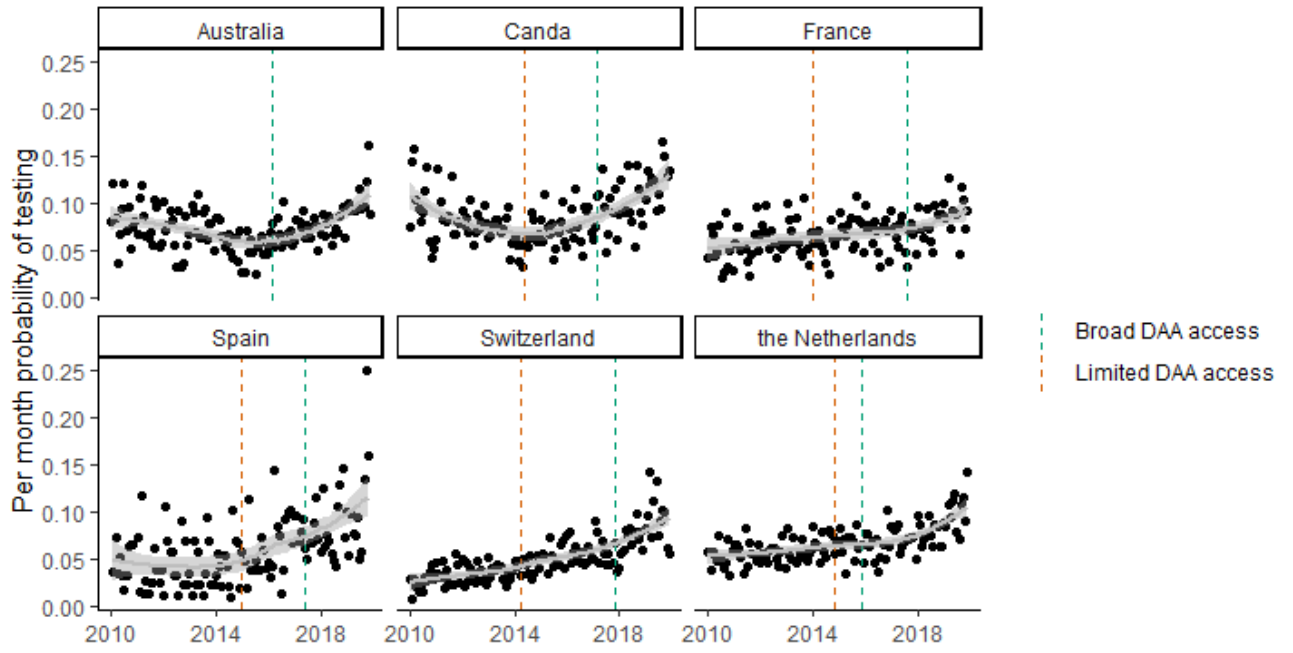

**Figure S2:** Proportion and number of events due to reinfection, including multiple reinfections, in five countries with primary and reinfection data available

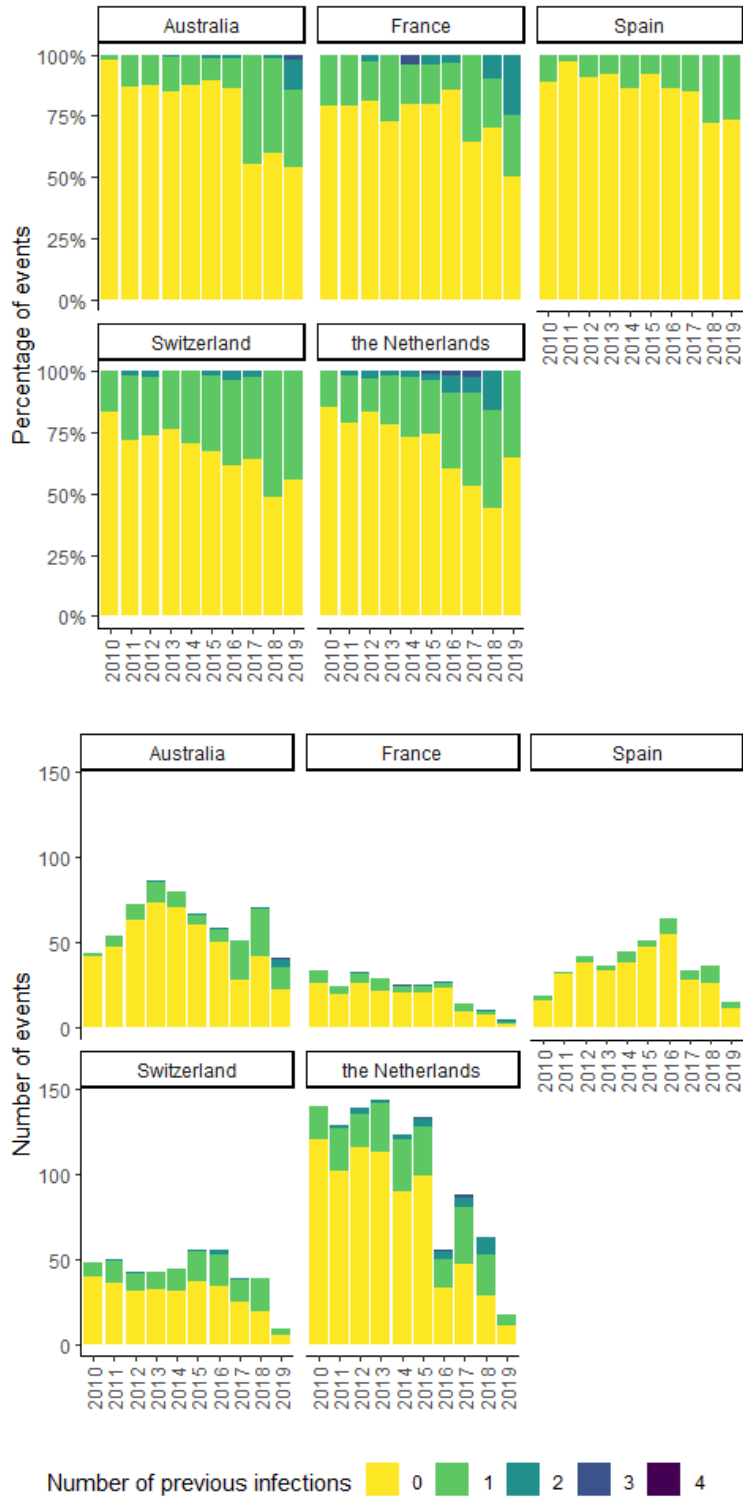



**Table S4: List of sensitivity analyses and differences relative to the primary analysis**

| Label | Domain                                                                                         | Primary analysis                                                                                                                                                                                                                                                                                                                                                                                                                                                                                                                                                                                                    | Sensitivity analysis                                                                                                                                                                                                                                                                                                                                                                                                                                                                                                                                                                                                              |
|-------|------------------------------------------------------------------------------------------------|---------------------------------------------------------------------------------------------------------------------------------------------------------------------------------------------------------------------------------------------------------------------------------------------------------------------------------------------------------------------------------------------------------------------------------------------------------------------------------------------------------------------------------------------------------------------------------------------------------------------|-----------------------------------------------------------------------------------------------------------------------------------------------------------------------------------------------------------------------------------------------------------------------------------------------------------------------------------------------------------------------------------------------------------------------------------------------------------------------------------------------------------------------------------------------------------------------------------------------------------------------------------|
| S1    | Regression model to assess change in slope of reinfection incidence                            | Change of slope at each DAA change point but no change in intercept                                                                                                                                                                                                                                                                                                                                                                                                                                                                                                                                                 | Change in slope and intercept at each DAA change point (interrupted time series model)                                                                                                                                                                                                                                                                                                                                                                                                                                                                                                                                            |
| S2    | Regression model to assess change in slope of reinfection incidence                            | Common slope across countries for each DAA period                                                                                                                                                                                                                                                                                                                                                                                                                                                                                                                                                                   | Random slope per country for the broad DAA access period, to allow differences between countries in the broad DAA access period.                                                                                                                                                                                                                                                                                                                                                                                                                                                                                                  |
| S3    | Spontaneous clearance definition                                                               | Two consecutive HCV RNA negative tests $\geq 28$ days apart after an HCV antibody or RNA positive test                                                                                                                                                                                                                                                                                                                                                                                                                                                                                                              | One HCV RNA negative test after and HCV antibody or RNA positive test                                                                                                                                                                                                                                                                                                                                                                                                                                                                                                                                                             |
| S4    | Australia's limited DAA access period                                                          | No period of limited DAA access in Australia (consistent with policy)                                                                                                                                                                                                                                                                                                                                                                                                                                                                                                                                               | Assume a period of limited access prior to broad access given to reflect DAA treatments through compassionate access, clinical trials and overseas buyer schemes at this time.                                                                                                                                                                                                                                                                                                                                                                                                                                                    |
| S5    | Inclusion of Spain                                                                             | Spain included.                                                                                                                                                                                                                                                                                                                                                                                                                                                                                                                                                                                                     | Spain excluded.                                                                                                                                                                                                                                                                                                                                                                                                                                                                                                                                                                                                                   |
| S6    | Inclusion of Australia                                                                         | Australia included                                                                                                                                                                                                                                                                                                                                                                                                                                                                                                                                                                                                  | Australia excluded                                                                                                                                                                                                                                                                                                                                                                                                                                                                                                                                                                                                                |
| S7    | Restricting HCV reinfections to those with evidence of HCV RNA viral load $\geq 100$ copies/mL | HCV RNA status (positive vs negative) was defined on the basis of a qualitative HCV RNA test, or if there was no qualitative result available, a HCV RNA quantitative test result. Quantitative HCV RNA test results were classified as positive if the result was greater than or equal to the lower limit of detection, or 15 copies/mL if the lower limit of detection was unknown. A reinfection event was defined as one or more HCV RNA positive tests after treatment-induced or spontaneous clearance. In some cases, a reinfection event may consist of a single low positive ( $<100$ copies/mL) HCV RNA. | For the purposes of defining spontaneous clearance and treatment-induced clearance HCV RNA status was defined in the same way as the primary analysis. For the purpose of defining reinfection events, participants were classified as HCV RNA positive on a given date if there was quantitative test undertaken and HCV RNA was greater than or equal to 100 copies/mL. If there was no quantitative test undertaken, positivity was defined on the basis of a positive qualitative HCV RNA result. This meant that events with a single low positive HCV RNA were not classified as reinfections in this sensitivity analysis. |
| S8    | Total HCV incidence confidence intervals                                                       | Poisson confidence intervals, no adjustment for within person correlation in multiple infection per person analysis                                                                                                                                                                                                                                                                                                                                                                                                                                                                                                 | Robust sandwich estimator confidence intervals calculated using a GEE model with independent correlation structure                                                                                                                                                                                                                                                                                                                                                                                                                                                                                                                |

**Table S5: Sensitivity analysis: Piecewise Exponential Model**

|                                     | Main result      | S3               | S4               | S5               | S6               | S7               |
|-------------------------------------|------------------|------------------|------------------|------------------|------------------|------------------|
| N                                   | 6144             | 6278             | 6144             | 5690             | 5266             | 6125             |
| Cases                               | 643              | 878              | 643              | 596              | 549              | 575              |
| Intercept: IR (95% CI)              | 0.04 (0.03-0.06) | 0.07 (0.05-0.11) | 0.04 (0.03-0.06) | 0.04 (0.03-0.06) | 0.04 (0.03-0.06) | 0.04 (0.02-0.06) |
| Limited DAA access:<br>IRR (95% CI) | 0.96 (0.78-1.19) | 0.91 (0.77-1.07) | 0.89 (0.73-1.09) | 0.95 (0.76-1.18) | 0.95 (0.77-1.18) | 0.86 (0.68-1.08) |
| Broad DAA access:<br>IRR (95% CI)   | 0.72 (0.60-0.86) | 0.51 (0.44-0.60) | 0.70 (0.58-0.84) | 0.68 (0.56-0.82) | 0.69 (0.56-0.84) | 0.73 (0.61-0.88) |
| AIC                                 | 6794.9           | 9448.9           | 6794.7           | 6349.2           | 5848.0           | 6156.5           |
| BIC                                 | 6826.7           | 9480.6           | 6826.5           | 6380.7           | 5879.2           | 6188.2           |

S3: Spontaneous clearance definition defined as a single HCV RNA negative test. S4: Define a limited access period for Australia. S5: Remove Spain from the analysis. S6. Remove Australia from the analysis. S7: Exclude HCV RNA < 100 copies/mL from reinfection classification

CI: Confidence interval

IRR: Incidence rate ratio

IR: Incidence rate

**Table S6: Sensitivity analysis: association between DAA change points and change in rate of change of HCV incidence**

|                                                                   | Main result      | S1               | S2               | S3               | S4               |
|-------------------------------------------------------------------|------------------|------------------|------------------|------------------|------------------|
| Intercept: IR (95% CI)                                            | 0.04 (0.03-0.06) | 0.04 (0.03-0.06) | 0.04 (0.03-0.06) | 0.07 (0.05-0.10) | 0.04 (0.03-0.06) |
| Slope: IRR (95% CI)                                               | 1.03 (0.96-1.10) | 1.04 (0.96-1.14) | 1.02 (0.95-1.10) | 0.97 (0.92-1.03) | 1.05 (0.98-1.13) |
| Immediate change associated with limited DAA access: IRR (95% CI) |                  | 0.99 (0.73-1.34) |                  |                  |                  |
| Immediate change associated with broad DAA access: IRR (95% CI)   |                  | 0.72 (0.48-1.07) |                  |                  |                  |
| Change in slope* associated with limited DAA access: IRR (95% CI) | 0.82 (0.72-0.94) | 0.85 (0.74-0.98) | 0.85 (0.73-1.00) | 0.88 (0.79-0.99) | 0.79 (0.68-0.92) |
| Change in slope* associated with broad DAA access: IRR (95% CI)   | 0.90 (0.78-1.04) | 0.99 (0.83-1.17) | 0.86 (0.64-1.15) | 0.88 (0.78-1.00) | 0.90 (0.78-1.03) |
| AIC                                                               | 9851.4           | 9851.3           | 9855.7           | 12897.9          | 9849.4           |
| BIC                                                               | 9903.0           | 9923.6           | 9927.9           | 12949.5          | 9901.0           |
|                                                                   | S5               | S6               | S7               |                  |                  |
| Intercept: IR (95% CI)                                            | 0.04 (0.03-0.06) | 0.04 (0.02-0.05) | 0.04 (0.02-0.06) |                  |                  |
| Slope: IRR (95% CI)                                               | 1.02 (0.95-1.09) | 1.07 (0.99-1.16) | 1.00 (0.93-1.07) |                  |                  |
| Change in slope* associated with limited DAA access: IRR (95% CI) | 0.81 (0.71-0.93) | 0.78 (0.67-0.91) | 0.87 (0.75-1.01) |                  |                  |
| Change in slope* associated with broad DAA access: IRR (95% CI)   | 0.90 (0.78-1.05) | 0.83 (0.71-0.98) | 0.94 (0.81-1.09) |                  |                  |
| AIC                                                               | 9149.3           | 8405.4           | 8868.9           |                  |                  |
| BIC                                                               | 9200.6           | 8456.3           | 8920.5           |                  |                  |

S1: Interrupted time series model. S2: Random slope for broad DAA access period model. S2: Spontaneous clearance definition defined as a single HCV RNA negative test. S3: Define a limited access period for Australia. S4: Remove Spain from the analysis. S5. Remove Australia from the analysis. S6: Exclude HCV RNA < 100 copies/mL.

**Figure S3:** Predicted incidence of first HCV reinfection in 6144 participants of InCHEHC cohorts prior to and during limited and broad DAA access: Changes in the rate of change by country, sensitivity analysis where Australia was assumed to have a limited access period

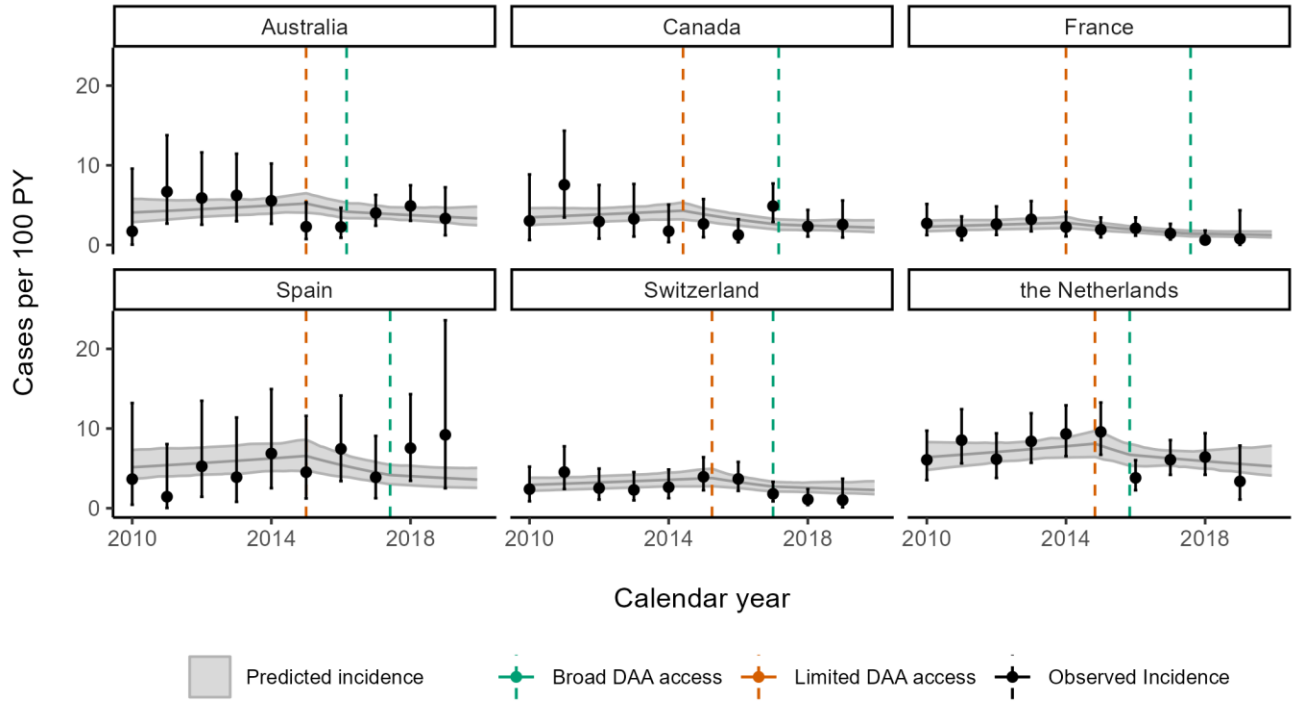

**Figure S4:** Sensitivity analysis 7 showing robust sandwich estimator (GEE) vs standard Poisson confidence intervals for the calculation of combined HCV incidence (primary and reinfection incidence)

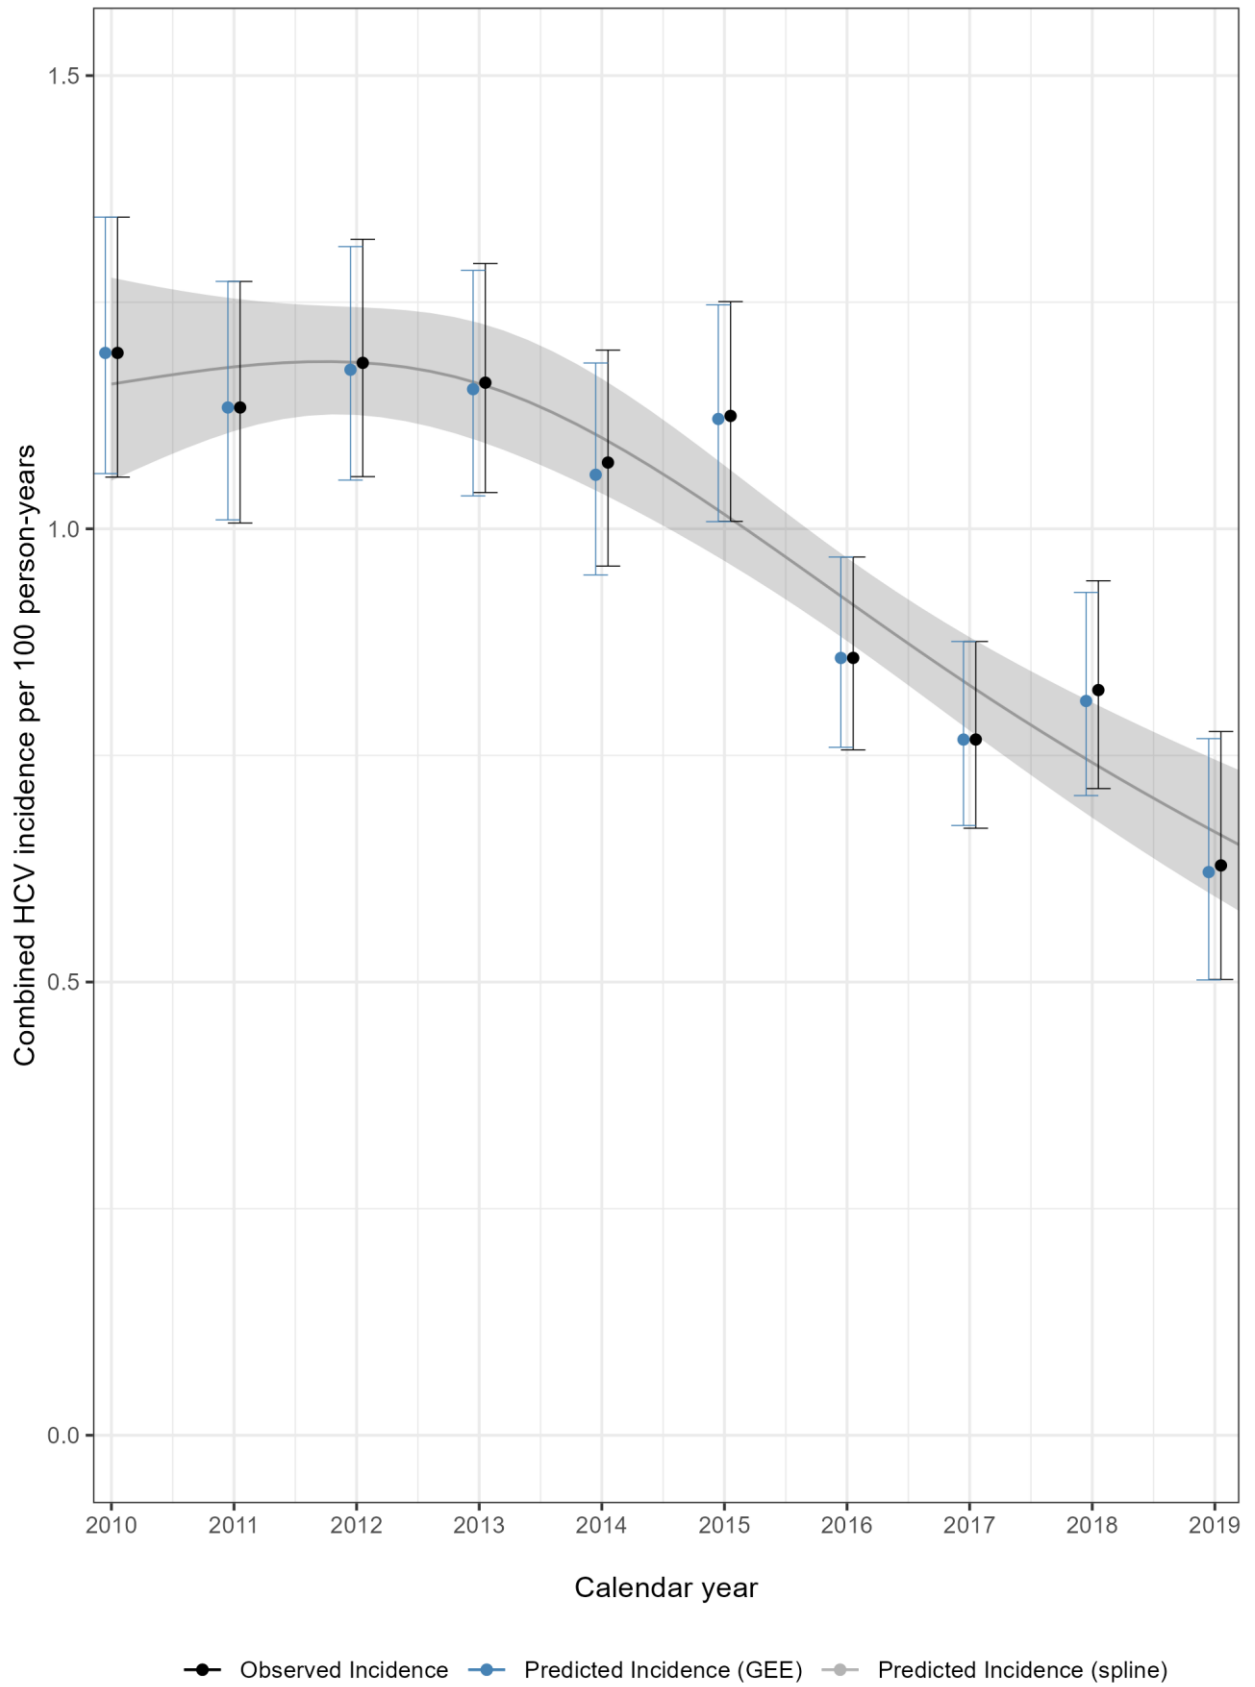

### **3. on behalf of the InCHEHC Collaboration:**

**Coordinating centre, ACCESS and Co-EC:** Margaret Hellard, Rachel Sacks-Davis, Daniela van Santen, Ashleigh Stewart, **ACCESS:** Mark Stooze, Rebecca Guy, Alisa Pedrana, Jason Asselin, Joshua Dawe, Anna Wilkinson **ATHENA:** Anders Boyd, Colette Smit, Marc van der Valk, Janke Schinkel, **ANRS CO13 HEPAVIH:** Linda Wittkop, Dominique Salmon, Philippe Sogni, Laure Esterle, Camille Gilbert, Laurence Merchadou, Stephanie Gillet, Coralie Khan, **ANRS CO3 AQUITAINE:** Fabrice Bonnet, Linda Wittkop, Olivier Leleux, Fabien Le Marec, Adelaïde Perrier **CEASE:** Gail Matthews, Ineke Shaw, Marianne Martinello, Tanya Applegate, Joanne Carson ; **co-EC:** Joseph Doyle, Brendan Harney, Melissa Bryant, **CoRIS:** Inmaculada Jarrín Vera, Belén Alejos, Jeffrey V Lazarus, Cristina Moreno, Rebeca Izquierdo, Marta Rava, **CCC:** Marina Klein, Shouao Wang, Jessica Lumia, Costa Pexos, Hansi Peiris, Sahar Saeed, Erica Moodie, Jim Young, Neora Pick, Brian Conway, Mark Hull, Alex Wong, John Gill, Lisa Barrett, Jeff Cohen, Joseph Cox, Pierre Cote, Shariq Haider, Danielle Rouleau, Marie-Louise Vachon, Anita Rachlis, Roger Sandre, Sharon Walmsley, Aida Sadr, Curtis Cooper, Steve Sanche, **SHCS:** Andri Rauch, Catrina Mugglin, Luisa Salazar-Viscaya, Katharina Kusejko, **MOSAIC:** Maria Prins, Kris Hage, **SAIDCC:** Karine Lacombe, Maria-Bernarda Requena, Pierre-Marie Girard, Matthieu Brucker, Jean-Paul Vincensini.

#### *Cohort name abbreviations:*

ACCESS: Australian Collaboration for Coordinated Enhanced Sentinel Surveillance

ATHENA: AIDS Therapy Evaluation in the Netherlands

AQUITAINE: ANRS CO3 AQUITAINE / AquiviH-NA - prospective clinical based HIV cohort

CCC: Canadian Co-infection Cohort

CEASE: Control and Elimination within AuStralia of HEpatitis C from people living with HIV

Co-EC: Eliminating hepatitis C transmission by enhancing care and treatment among HIV co-infected individuals

CORIS: The cohort of Spanish HIV research network

HEPAVIH: Clinical Centres Collaborations of Subjects Co-infected with HIV and HCV

MOSAIC: MSM Observational Study of Acute Infection with hepatitis C

SAIDCC: Saint-Antoine Infectious Disease Clinical Cohort

SHCS: Swiss HIV cohort Study

## 4. Participating cohort ethics and funding

### *Ethics committees*

Ethics approval for the coordinating centre was granted by the Alfred Hospital Human Research Ethics Committee. Ethics approval for each cohort has been granted by the following committees: ACCESS: Alfred Hospital Human Research Ethics Committee. ANRS CO13 HEPAVIH: CPP Ile de France III. ANRS CO3 AQUITAINE: CPP Sud-Ouest et Outre-mer III. ATHENA cohort: At initiation, the cohort was approved by the institutional review board of all participating centres. People entering HIV care receive written material about participation in the ATHENA cohort and are being informed by their treating physician of the purpose of collection of data, after which they can consent verbally or elect to opt-out. Data are pseudonymised before being provided to investigators and may be used for scientific purposes. A designated quality management coordinator safeguards compliance with the European General Data Protection Regulation. Canadian Coinfection Cohort: McGill University Health Centre Research Ethics Board. CoRIS: Comité Ético de Investigación Clínica del Hospital General Universitario Gregorio Marañón. MOSAIC: Institutional Review Board of the Academic Medical Center and ethical committees/board of directors of each institute recruiting participants. SAIDCC: Registre général des traitements de l'APHP.

The SHCS was approved by the local ethical committees of the participating centres: Ethikkommission beider Basel ("Die Ethikkommission beider Basel hat die Dokumente zur Studie zustimmend zur Kenntnis genommen und genehmigt."); Kantonale Ethikkommission Bern (21/88); Comité départemental d'éthique des spécialités médicales et de médecine communautaire et de premier recours, Hôpitaux Universitaires de Genève (01–142); Commission cantonale d'éthique de la recherche sur l'être humain, Canton de Vaud (131/01); Comitato etico cantonale, Repubblica e Cantone Ticino (CE 813); Ethikkommission des Kantons St. Gallen (EKSG 12/003); Kantonale Ethikkommission Zürich (KEK-ZH-NR: EK-793), and written informed consent was obtained from all participants.

### *Funding*

ACCESS is funded by the Australian Department of Health. The ATHENA database is maintained by Stichting HIV Monitoring and supported by a grant from the Dutch Ministry of Health, Welfare and Sport through the Centre for Infectious Disease Control of the National Institute for Public Health and the Environment. The Canadian Co-infection Cohort is supported by the Canadian Institutes of Health Research (CIHR FDN-143270), the CIHR Canadian HIV Trials Network (CTN222) and the Fonds de recherche du Québec - Santé (FRQ-S): Réseau SIDA/maladies infectieuses. The RIS cohort (CoRIS) is supported by the Instituto de Salud Carlos III through the Red Temática de Investigación Cooperativa en Sida (RD06/006, RD12/0017/0018 and RD16/0002/0006) as part of the Plan Nacional R+D+I and cofinanced by ISCIII-Subdirección General de Evaluación y el Fondo Europeo de Desarrollo Regional (FEDER). The MOSAIC study is financially supported by the 'Aidsfonds' Netherlands (grant numbers 2008.026 and 2013.037) ; the Research and Development Foundation of the Public Health Service of Amsterdam; Gilead Sciences Netherlands BV and AbbVie BV. The Saint-Antoine Infectious Disease Clinical Cohort is funded by the Saint-Antoine hospital. This study has been financed within the framework of the Swiss HIV Cohort Study, supported by the Swiss National Science Foundation (grant #201369) and by the SHCS research foundation. The ANRS CO13 Hepavir cohort is supported by the French national Agency for HIV and Hepatitis Research (ANRS). The ANRS CO3 Aquitaine cohort is supported by the ANRS | MIE and the CHU de Bordeaux.

## 5. Additional acknowledgements

Members of the **AQUITAINE (ANRS CO3 AQUITAINE / AquiviH-NA)** scientific committee: P. Bellecave, P. Blanco, F. Bonnet (Chair), S. Bouchet, D. Breilh, C. Cazanave, S. Desjardin, V. Gaborieau, A. Gimbert, M. Hessamfar, L. Lacaze-Buzy, D. Lacoste, ME Lafon, E. Lazaro, O. Leleux., F. Le Marec, G. Le Moal, D. Malvy, L. Marchand, P. Mercié, D. Neau, I. Pellegrin, A. Perrier, V. Petrov-Sanchez, M.O. Vareil and L. Wittkop (Methodologist). Participating centers: Hôpital Saint André, CHU de Bordeaux, Médecine Interne et Maladies Infectieuses (N. Bernard, F. Bonnet, D. Bronnimann H. Chaussade, D. Dondia, P. Duffau, I. Faure, M. Hessamfar, P. Mercié, P. Morlat, E. Mériquier, F. Paccalin, E. Riebero, C. Rivoisy and MA Vandenhende); Hôpital Pellegrin, CHU de Bordeaux, Maladies Infectieuses et Tropicales (L. Barthod, C. Cazanave, FA. Dauchy, A. Desclaux, M. Ducours, H. Dutronc, A. Duvignaud, J. Leitao, M. Lescure, D. Neau, D. Nguyen, D. Malvy, T. Pistone, M. Puges and G. Wirth); Hôpital Haut-Lévêque, CHU de Bordeaux, Médecine Interne et Maladies Infectieuses (C. Courtault, F. Camou, C. Greib, E. Lazaro, JL. Pellegrin, E. Rivière and JF. Viallard); Hôpital d'Agen, Médecine Interne (Y. Imbert, M. Thierry-Mieg and P. Rispal); Hôpital de Libourne, Médecine Interne (O. Caubet, H. Ferrand and S. Tchamgoué); Hôpital de Bayonne, Maladies Infectieuses (S. Farbos, MO. Vareil, H. Wille); Hôpital de Dax, Médecine Interne et Maladies Infectieuses, (K. Andre, L. Caunegre, Y. Gerard and F. Osorio-Perez); Hôpital Saint-Cyr/Villeneuve-sur-Lot, Maladies Infectieuses (I. Chossat); Hôpital de Mont de Marsan, Médecine Interne et Maladies Infectieuses (G. Iles, Y. Gerard, M. Labasse-Depis and F. Lacassin); Hôpital d'Arcachon, Médecine Interne (A. Barret and C. Courtault); Hôpital de Périgueux, Médecine Interne et Maladies Infectieuses (B Castan, J. Koffi, N. Rouanes, A. Saunier and JB Zabbe); Hôpital de Pau, Médecine Interne et Maladies Infectieuses (G. Dumondin and V. Gaborieau); Hôpital d'Orthez, Médecine Interne (Y. Gerard); CHU de Poitiers, Médecine Interne et Maladies Infectieuses (G. Beraud, G. Le Moal, M. Catroux, M. Garcia, V. Giraud, JP. Martellosio and F. Roblot); Hôpital de Saintes, Médecine Interne (T. Padeloup); Hôpital d'Angoulême, Médecine Interne (A. Riché, M. Grosset, S. Males and C. Ngo Bell); Hôpital de Jonzac, Maladies Infectieuses (T. Padeloup); Hôpital de Saint jean d'Angely, Maladies Infectieuses (T. Padeloup). Other departments: Immunology: P. Blanco and I. Pellegrin; CRB-BBS: C. Carpentier and I. Pellegrin; Virology: P. Bellecave, ME. Lafon and C. Tumiotto; Pharmacology: S. Bouchet, D. Breilh and G. Miremeont-Salamé; Data collection: D. Arma, G. Arnou, MJ Blaizeau, P. Camps, M. Decoin, S. Delveaux, F. Diarra, L. Gabrea, S. Lawson-Ayayi, E. Lenaud, D. Plainchamps, A. Pougetoux, B. Uwamaliya and K. Zara; IT department: V. Conte and M. Gapillout; Project team: O. Leleux (Project Leader), F. Le Marec (Statistitien), A. Perrier (Data Manager)

The scientific committee of the **ANRS CO13 HEPAVIH** including Study Group: D. Salmon (co-Principal investigator), L. Wittkop (co-Principal Investigator & Methodologist), P. Sogni (co-Principal Investigator), P. Carrieri, L. Esterle (project manager), P. Trimoulet, J. Izopet, L. Serfaty, M.A. Valantin, G. Pialoux, J. Chas, K. Barange, A. Naqvi, E. Rosenthal, A. Bicart-See, O. Bouchaud, A. Gervais, C. Lascoux-Combe, C. Goujard, K. Lacombe, C. Duvivier, , D. Neau, P. Morlat, F. Bani-Sadr, F. Boufassa, , C. Solas, H. Fontaine, L. Piroth, A. Simon, D. Zucman, F. Boué, P. Miaillhes, E. Billaud, H. Aumaître, D. Rey, G. Peytavin, O Zaegler.

All clinicians and clinical research technicians participating to the **SAIDCC** database of the Infectious Diseases Unit of St Antoine Hospital, AP-HP, Paris, France: Jean-Luc Meynard, Jérôme Pacanowski, Laure Surgers, Marie-Caroline Meyohas, Dorothee Chopin, Benedicte Lefebvre, Diane Bollens, Laure



Surgers, Nadia Valin, Thibault Chiarabini, Zineb Ouazene, Pauline Campa, Julie Lamarque, Rym Monard and Christian Tran.

We acknowledge the **CoRIS** steering committee members Santiago Moreno, Inma Jarrín, David Dalmau, Maria Luisa Navarro, Maria Isabel Gonzalez, Federico Garcia, Eva Poveda, Jose Antonio Iribarren, Felix Gutierrez, Rafael Rubio, Francesc Vidal, Juan Berenguer, Juan Gonzalez and M Angeles Munoz-Fernandez.

Members of the **Swiss HIV Cohort Study** Abela I, Aebi-Popp K, Anagnostopoulos A, Battegay M, Bernasconi E, Braun DL, Bucher HC, Calmy A, Cavassini M, Ciuffi A, Dollenmaier G, Egger M, Elzi L, Fehr J, Fellay J, Furrer H, Fux CA, Günthard HF (President of the SHCS), Hachfeld A, Haerry D (deputy of "Positive Council"), Hasse B, Hirsch HH, Hoffmann M, Hösli I, Huber M, Jackson-Perry D (patient representatives), Kahlert CR (Chairman of the Mother & Child Substudy), Kaiser L, Keiser O, Klimkait T, Kouyos RD, Kovari H, Kusejko K (Head of Data Centre), Labhardt N, Leuzinger K, Martinez de Tejada B, Marzolini C, Metzner KJ, Müller N, Nemeth J, Nicca D, Notter J, Paioni P, Pantaleo G, Perreau M, Rauch A (Chairman of the Scientific Board), Salazar-Vizcaya L, Schmid P, Speck R, Stöckle M (Chairman of the Clinical and Laboratory Committee), Tarr P, Trkola A, Wandeler G, Weisser M, Yerly S.
